# Supplementary material for: Targeted Amplicon Deep Sequencing for Monitoring Antimalarial Resistance Markers in Western Kenya
Source: PubMed Central journal article supplement (PMC9017353; doi:10.1128/aac.01945-21), 2022-03-10
Supplement: aac.01945-21-s0001.pdf [file aac.01945-21-s0001.pdf]

**Supplementary table 1:** RT-PCR and nested PCR primer sequences

| Gene           | Primer       | Sequence 5'-3'                     | Bases | Reference              |
|----------------|--------------|------------------------------------|-------|------------------------|
| <i>18s RNA</i> | 18s Pf F     | GTAATTGGAATGATAGGAATTTACAAGGT      | 29    | Hermsen et al.2001     |
|                | 18s Pf R     | TCAACTACGAACGTTTTAACTGCAAC         | 26    |                        |
|                | 18s Pf probe | AACAATTGGAGGGCAAG                  | 17    |                        |
| <i>dhps</i>    | dhps_extF    | CTAAACGTGCTGTTCAAAGAATG            | 23    | Designed in this study |
|                | dhps_extR    | GTGGATACTCATCATATACATG             | 22    |                        |
|                | dhps_intF    | [MID tag]-GATAAATGAAGGTGCTAGTGT    | 21    |                        |
|                | dhps_intR    | GAGTTTAATAGATTGATCATG              | 21    |                        |
| <i>k13</i>     | k13_extF     | CTTAACTTCTTAAGAAATCCG              | 21    | Designed in this study |
|                | k13_extR     | AGGCATATGGAAATTGTTCCC              | 21    |                        |
|                | k13_intF     | [MID tag]-GAAGCCTTGTTGAAAGAAGCAG   | 22    |                        |
|                | k13_intR     | CACCATTAGTTCACCAATGAC              | 22    |                        |
| <i>dhfr</i>    | dhfr_extF    | CTCCTTTTTATGATGGAACAAGT            | 23    | Designed in this study |
|                | dhfr_extR    | CTTTTCTAAAAATTCTTGATAAAC           | 24    |                        |
|                | dhfr_intF    | [MID tag]-GAACAAGTCTGCGACGTTTC     | 21    |                        |
|                | dhfr_intR    | CTTGATAAACACGGAACCTCC              | 22    |                        |
| <i>mdr1</i>    | mdr1_extF    | GAGTTGAACAAAAAGAGTACCG             | 22    | Designed in this study |
|                | mdr1_extR    | CCATTAAAGCCTTCTATAATGG             | 24    |                        |
|                | mdr1_intF    | [MID tag]-GTATGTGCTGTATTATCAGG     | 20    |                        |
|                | mdr1_intR    | GTATTGTTATTATATAACAAAG             | 22    |                        |
| <i>crt</i>     | crt76_F      | GGTGGAGGTTCTTGCTTGG                | 20    | Okombo et al. 2014     |
|                | Crt76_R      | ATAAAGTTGTGAGTTTCGGATG             | 22    |                        |
|                | crt145_extF  | CTTATGACCTTTTTAGGAACG              | 21    | Designed in this study |
|                | crt145_extR  | CTTAATATTA AAAAGCAGAAGAAC          | 24    |                        |
|                | crt145_intF  | AGGAACGACACCGAAGCT                 | 18    |                        |
|                | crt145_intR  | GCAGAAGAACATATTAATAGG              | 21    |                        |
| <i>ama1</i>    | ama1_ext_F   | GGAGAAGATGCTGAAGTAGCTGG            | 23    | Designed in this study |
|                | ama1_ext_R   | GGTATATCTTCACAATTTCCATCG           | 24    |                        |
|                | ama1_int_F   | [MID tag]-GAAATGTCCAGTATTTGGTAAAGG | 24    |                        |
|                | ama1_int_R   | CCCATAATCCGAATTTGCATTC             | 23    |                        |

**Supplementary Table 2:** Multiplex identifier (MID) 10bp sequence sets

| <b>MID tag</b> | <b>sequence</b> | <b>MID tag</b> | <b>sequence</b> |
|----------------|-----------------|----------------|-----------------|
| MID-1          | ACGAGTGCGT      | MID-9          | TCTCTATGCG      |
| MID-2          | ACGCTCGACA      | MID-10         | TGATACGTCT      |
| MID-3          | AGACGCACTC      | MID-11         | CATAGTAGTG      |
| MID-4          | AGCACTGTAG      | MID-12         | CGAGAGATAC      |
| MID-5          | ATCAGACACG      | MID-13         | ATACGACGTA      |
| MID-6          | ATATCGCGAG      | MID-14         | TCACGTAATA      |
| MID-7          | CGTGTCTCTA      | MID-15         | CGTCTAGTAC      |
| MID-8          | CTCGCGTGTC      | MID-16         | TCTACGTAGC      |

Amplicons were generated using forward primers tagged on the 5' end with the above listed MIDs. This enabled the unique identification of sequences from each sample during sequence data demultiplexing.

## References

Okombo J, Kamau AW, Marsh K, Sutherland CJ, Ochola-Oyier LI. Temporal trends in prevalence of *Plasmodium falciparum* drug resistance alleles over two decades of changing antimalarial policy in coastal Kenya. *Int J Parasitol Drugs Drug Resist.* 2014. 4(3):152-63.

Hermesen CC, Telgt DSC, Linders EHP, Van De Locht LATF, Eling WMC, Mensink EJBM, et al. Detection of *Plasmodium falciparum* malaria parasites in vivo by real-time quantitative PCR. *Mol Biochem Parasitol.* 2001. 118(2):247–51.
